# Supplementary material for: Relationships between leaf δ&lt;sup&gt;15&lt;/sup&gt;N and leaf metallic nutrients
Source: Copernicus journal article supplement (doi:10.5194/bg-2019-328), 2019-10-28
Supplement: Supplementary file [file bg-2019-328-AC1-supplement.pdf]

## Answers to the questions:

---

### Reviewer #1:

**1. Comment:** The manuscript reported large amount of valuable data. The result and discussion are generally reliable and reasonable. However, please check all the data carefully. For example, in Table S5,  $r$  value for  $\delta^{15}\text{N}$  vs pH is in bold font but its  $p$  value is larger than 0.05.

**Answer:** Thanks very much for your evaluation. We are very sorry for this mistake. We have corrected it (See Table S5) and thoroughly checked the data.

Table S5. The correlations between leaf  $\delta^{15}\text{N}$  and soil indexes.

| Correlations                                              | $r$          | $P$    |
|-----------------------------------------------------------|--------------|--------|
| Leaf $\delta^{15}\text{N}$ vs. soil $\delta^{15}\text{N}$ | <b>0.506</b> | < 0.01 |
| Leaf $\delta^{15}\text{N}$ vs. SOM                        | -0.010       | > 0.05 |
| Leaf $\delta^{15}\text{N}$ vs. pH                         | 0.031        | > 0.05 |
| Leaf $\delta^{15}\text{N}$ vs. soil C/N                   | 0.120        | < 0.05 |
| Leaf $\delta^{15}\text{N}$ vs. soil N                     | -0.074       | > 0.05 |
| Leaf $\delta^{15}\text{N}$ vs. soil density               | 0.102        | > 0.05 |
| Leaf $\delta^{15}\text{N}$ vs. soil sand                  | 0.007        | > 0.05 |
| Leaf $\delta^{15}\text{N}$ vs. soil silt                  | -0.010       | > 0.05 |
| Leaf $\delta^{15}\text{N}$ vs. soil clay                  | 0.033        | > 0.05 |
| Leaf $\delta^{15}\text{N}$ vs. soil silt/clay             | 0.092        | > 0.05 |
