# Supplementary material for: Relationships between leaf δ&lt;sup&gt;15&lt;/sup&gt;N and leaf metallic nutrients
Source: Copernicus journal article supplement (doi:10.5194/bg-2019-328), 2019-10-28
Supplement: Supplementary file [file bg-2019-328-AC3-supplement.pdf]

## Answers to the questions:

-----

### Reviewer #3:

**1. Comment:** Chen et al. used a long transect dataset to reveal the relationships between leaf  $\delta^{15}\text{N}$  and leaf metallic nutrients. This study is good and dataset is valuable.

**Answer:** Thanks for your comments.

**2. Comment:** It should give a more general introduction about the leaf  $^{15}\text{N}$ . What is the meaning of leaf  $^{15}\text{N}$  value can be given?

**Answer:** Thanks for your comments. We have added the statement about leaf  $\delta^{15}\text{N}$  (mark in blue color) in the introduction section as follows,

Nitrogen (N) cycling has received considerable attention, because N is the key element in regulating productivity of terrestrial ecosystems (Fay et al., 2015; Wieder et al., 2015) and many nitrogenous compounds generating from N cycling are associated with major environment issues (Bourgeois et al., 2018; Desmit et al., 2018). Natural N isotopic technique has been widely taken as a powerful tool in exploring the N biogeochemical cycling (Evans, 2001; Robinson, 2001), and nitrogen isotopic composition ( $\delta^{15}\text{N}$ ) in leaf has been usually regarded as an integrator of N cycling (Evans, 2001; Robinson, 2001; Houlton et al., 2006, 2007; McLauchlan et al., 2007, 2013). This might be associated with the fact that leaf  $\delta^{15}\text{N}$  could indicate soil N availability (Craine et al., 2009; Högberg et al., 2011) and plant N utilization strategies (Kolb and Evans, 2002; Houlton et al., 2007). Thus, revealing the potential factors that influence leaf  $\delta^{15}\text{N}$  and investigating the relationships between these factors and leaf  $\delta^{15}\text{N}$  could help improve our current understanding of N cycling (Craine et al., 2009; Hobbie and Högberg, 2012).

**3. Comment:** Why did not include the climate factors into the analysis? As we know the climatic factors are the most important factors in controlling leaf isotope values.

**Answer:** Yes, as we had mentioned in the introduction section, climatic factors, such

as temperature and precipitation, have been reported to exert important influences on the variations in leaf  $\delta^{15}\text{N}$ . However, we have emphatically explored the relationships between leaf  $\delta^{15}\text{N}$  and temperature and precipitation in another manuscript (Chen et al., under review). So in this manuscript, we just focused on the relationships between leaf  $\delta^{15}\text{N}$  and metallic nutrients and did not include the climate factors.

**4. Comment:** The AIC value is more useful to select which modeling is more powerful to build the relationships between isotope values and nutrients (Tables 1).

**Answer:** Thanks for your comments. We have calculated the AIC values of each model as in Table 1. The model 3 has the lowest AIC value of 1058.3, thus, the model 3 is the best for explaining the variations of leaf  $\delta^{15}\text{N}$ . Meanwhile, we find that the AIC value of model 3 is only slightly higher than that of model 1, which means adding leaf Fe, Mn and Zn could not significantly improve the goodness of fit of the model 3 compared with that of model 1. Thus, the results of AIC values are also consistent with the results of  $R^2$  or adjust  $R^2$ , i.e. the  $R^2$  or adjust  $R^2$  of model 3 is only a little larger than that of model 1. Comparison of the two models shows that leaf K, Ca, Mg are the major factors the main driving factors of leaf  $\delta^{15}\text{N}$ .

Table 1. Multiple linear regressions of leaf  $\delta^{15}\text{N}$  against leaf metallic nutrients based on ordinary least-square (OLS) estimation.

| Model | $R^2$ | Adjust $R^2$ | AIC    | $P$    |
|-------|-------|--------------|--------|--------|
| 1     | 0.543 | 0.540        | 1091.5 | <0.001 |
| 2     | 0.150 | 0.145        | 1404.6 | <0.001 |
| 3     | 0.557 | 0.551        | 1058.3 | <0.001 |

*Note:* Model-1 is the multiple regression of leaf  $\delta^{15}\text{N}$  against leaf K, Ca and Mg; Model-2 is the multiple regression of leaf  $\delta^{15}\text{N}$  against leaf Fe, Mn and Zn. Model-3 is the multiple regression of leaf  $\delta^{15}\text{N}$  against leaf K, Ca, Mg, Fe, Mn and Zn. AIC, Akaike Information Criterion.
